# Supplementary material
Source: publisher figshare collection journal article supplement (https://wiley.figshare.com/articles/dataset/_/4296227)
Supplement: Supplementary file 1 [file 1]

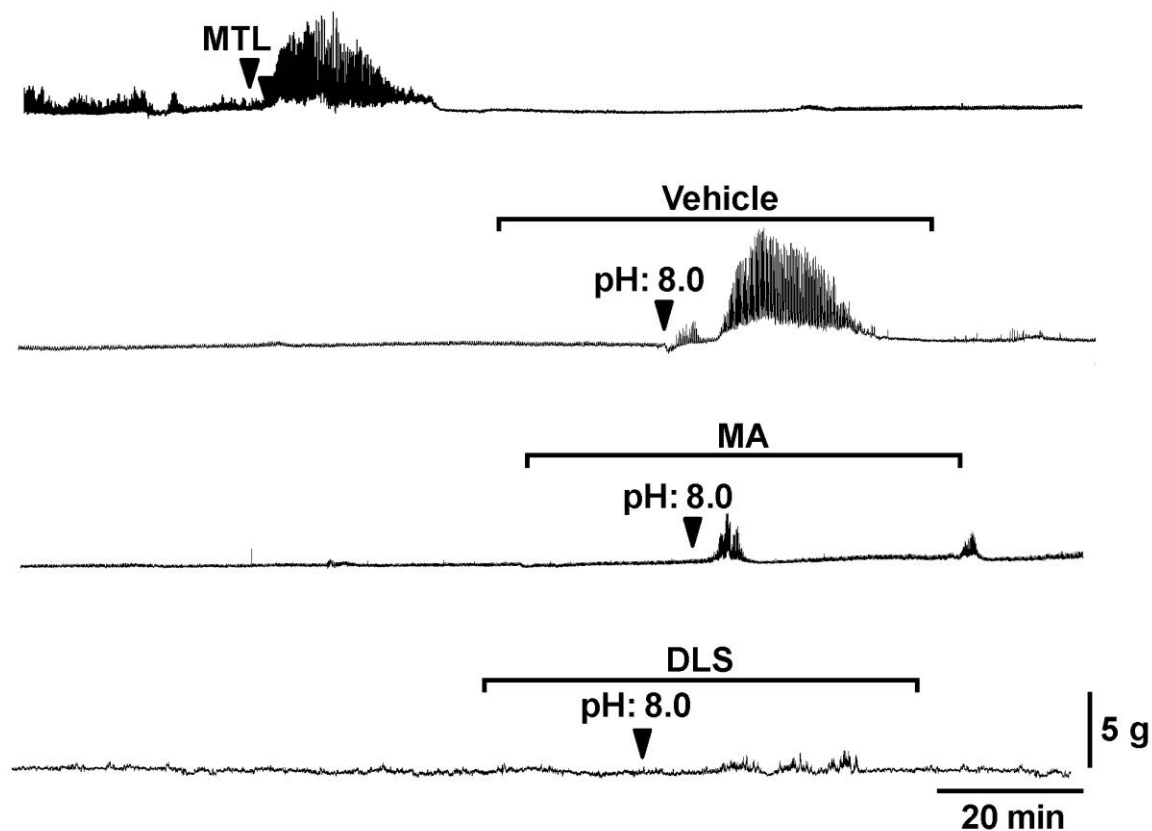

### Supplementary Figure 1

Effect of MA 2029 and D-lys3-GHRP6 on the intraduodenal (ID) infusion of pH 8 saline-induced gastric contraction in the vagotomized suncus. Representative traces showing the control contraction induced by motilin (300 ng/kg BW) and the ID infusion of pH 8 saline-induced contractions. Either MA-2029 (MA; 1 mg/kg/h, for 1 h) or D-lys3-GHRP6 (DLS; 6 mg/kg/h, for 1 h) infusion was started 20 min before the ID infusion of pH 8 saline. ID infusion of both MA and DLS eliminated alkaline saline-evoked gastric contraction. N = 3. Arrowheads indicate the timing of administration of reagents.
