# Supplementary material
Source: publisher figshare collection journal article supplement (https://wiley.figshare.com/articles/dataset/_/4296227)
Supplement: Supplementary file 2 [file 1]

Archive with 5 entries (5 files):
- Suppl Figures 1.pdf
- Suppl Figures 2.pdf
- Suppl Figures 3.pdf
- Suppl Figures 4.pdf
- Suppl Figures 5.pdf
