# Supplementary material
Source: publisher figshare collection journal article supplement (https://wiley.figshare.com/articles/dataset/_/4296227)
Supplement: Supplementary file 2 [file 1 › Suppl Figures 2.pdf]

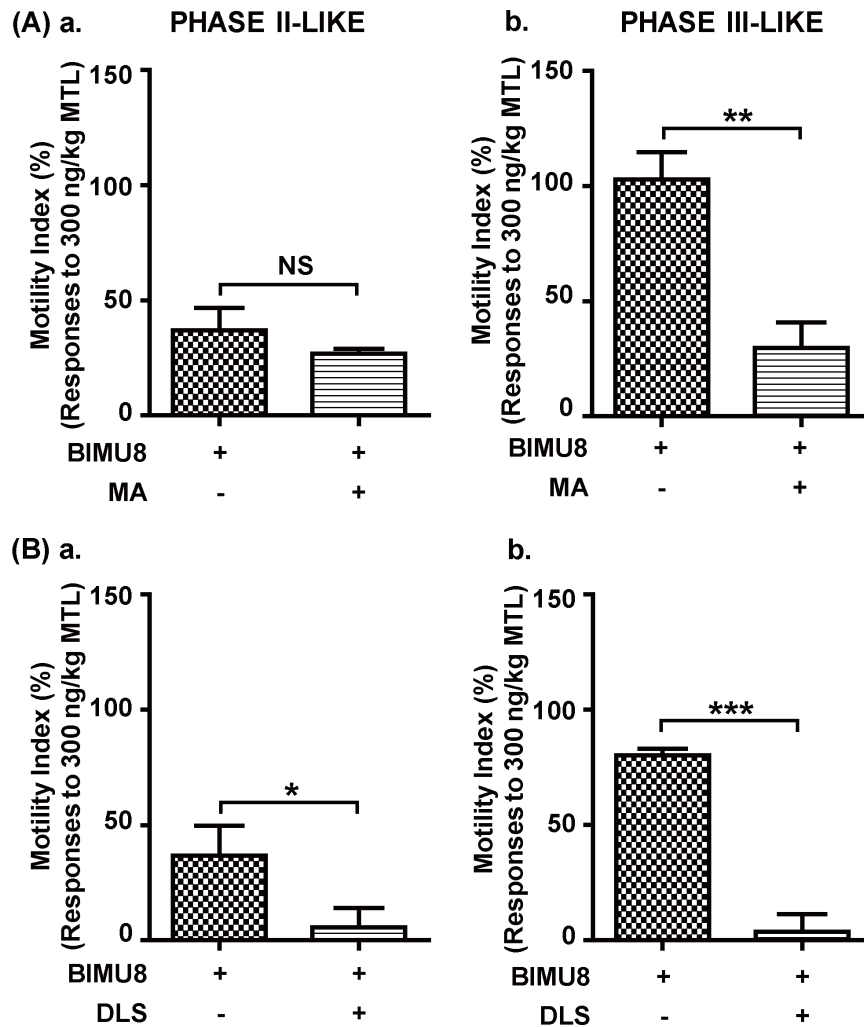

## Supplementary Figure 2

The motility index (MI) of the effect of MA-2029 and D-lys3-GHRP6 on BIMU8-induced gastric contraction in the anesthetized suncus. (A) The MI of the phase II-like (a) and phase III-like (b) gastric contraction in the presence or absence of MA. The MI of the phase III-like, but not phase II-like, contraction was significantly decreased in the presence of MA. (B) The MI of BIMU8-induced phase II-like (a) and phase III-like (b) gastric contraction was almost completely eliminated by DLS administration. The methodology followed to calculate the MI is described in the Materials and Methods section. Mean  $\pm$  SEM. Student's t test; N = 5, \*  $P < 0.05$ ; \*\*  $P < 0.01$ ; \*\*\*  $P < 0.001$ ; NS,  $P > 0.05$ .
