# Supplementary material
Source: publisher figshare collection journal article supplement (https://wiley.figshare.com/articles/dataset/_/4296227)
Supplement: Supplementary file 2 [file 1 › Suppl Figures 3.pdf]

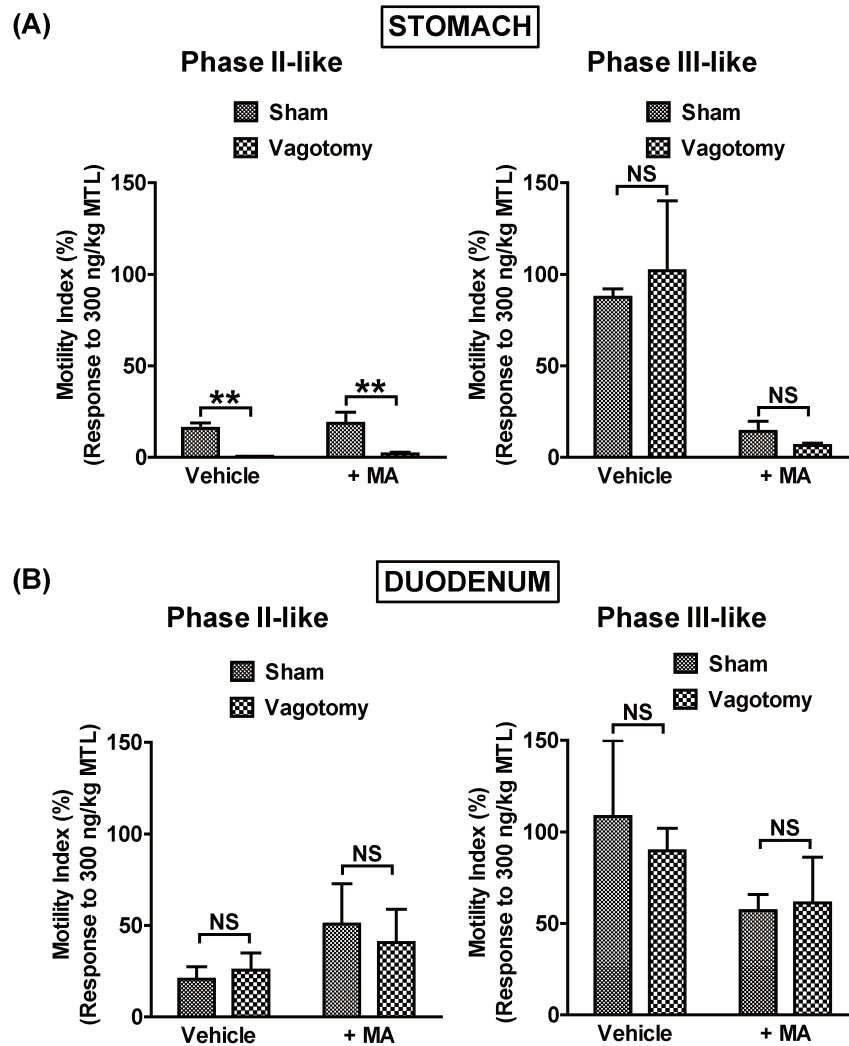

### Supplementary Figure 3

The MI of the effect of BIMU8 on gastric and duodenal contraction in the sham-operated and vagotomized suncus (A) MI calculated in the phase II- and III-like gastric contraction induced by BIMU8 administration. Vagotomy significantly reduced the MI of the gastric phase-II like contraction. On the other hand, the MI of the gastric phase III-like contraction remained insignificant in the vagotomized animal but decreased with motilin antagonist treatment. (B) MI of the BIMU8-induced duodenal phase II- and III-like contractions in the absence and presence of MA in the sham-operated and vagotomized suncus. Neither vagotomy nor MA had any significant effect on the MI of the duodenal phase II- and III-like contractions. The methodology followed to calculate the MI is described in the Materials and Methods section. Mean  $\pm$  SEM. Student's t-test (unpaired); \*\*P < 0.01; NS, P > 0.05; N = 3.
