# Supplementary material
Source: publisher figshare collection journal article supplement (https://wiley.figshare.com/articles/dataset/_/4296227)
Supplement: Supplementary file 2 [file 1 › Suppl Figures 4.pdf]

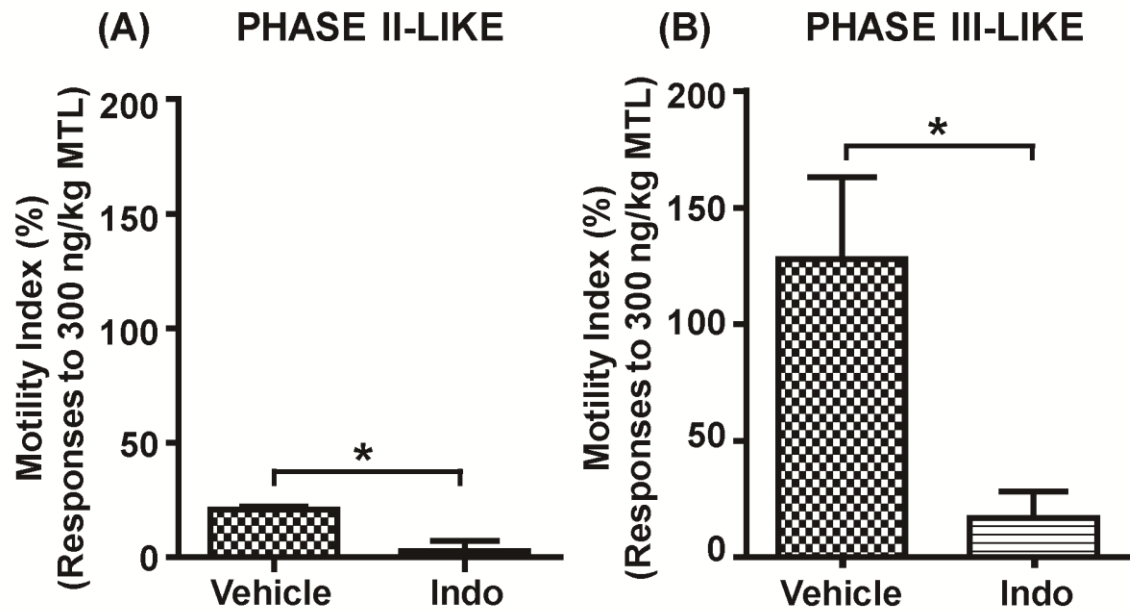

#### Supplementary Figure 4

The MI of the effect of indomethacin (Indo) on the gastric contractions induced during and after the continuous intraduodenal (ID) administration of pH 3 saline (A) MI of the ID infusion of pH 3 saline-induced gastric phase II-like contractions in the presence of vehicle or Indo. (B) MI of the ID infusion of pH 3 saline-induced gastric phase III-like contractions in the presence of vehicle or Indo. The methodology followed to calculate the MI is described in the Materials and Methods section. Mean  $\pm$  SEM. Student's t test; \*  $P < 0.05$ ;  $N = 3$ .
