# Supplementary material
Source: publisher figshare collection journal article supplement (https://wiley.figshare.com/articles/dataset/_/4296227)
Supplement: Supplementary file 2 [file 1 › Suppl Figures 5.pdf]

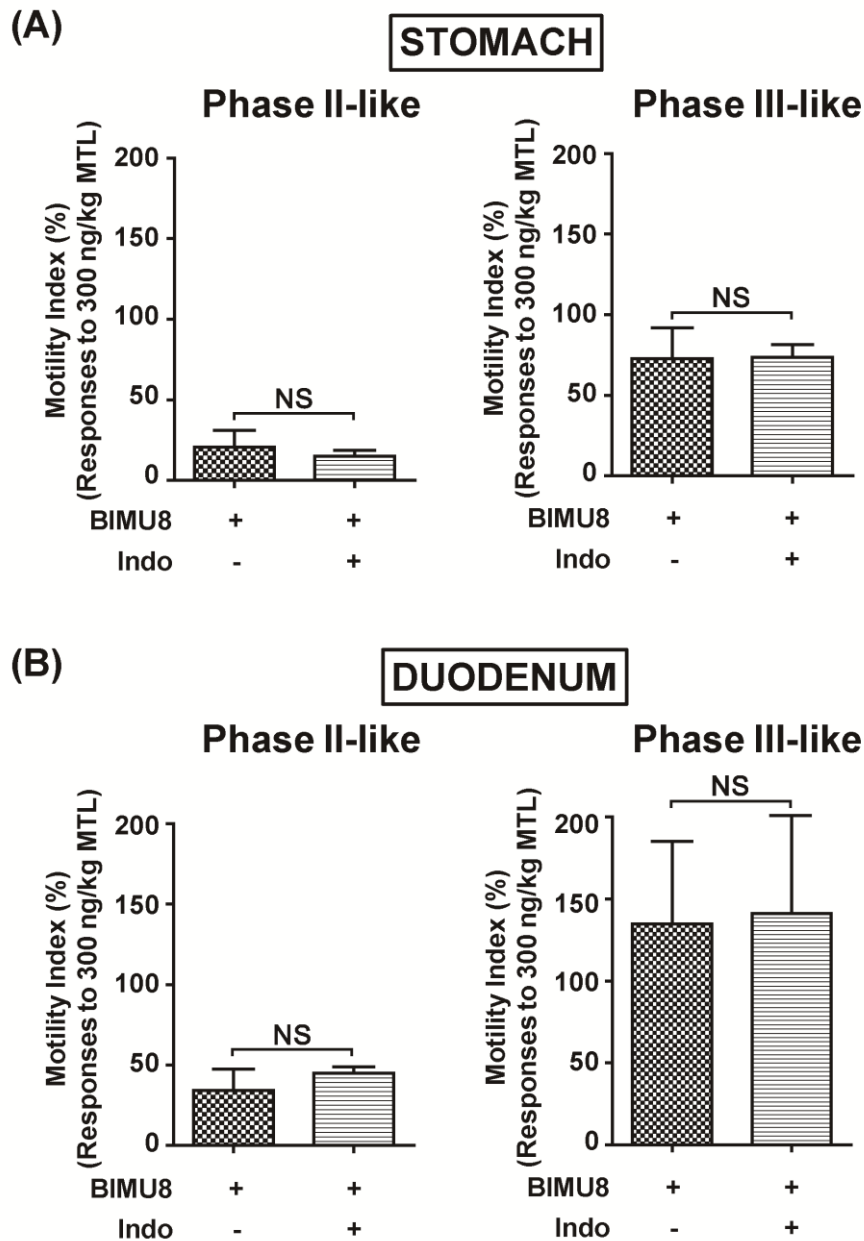

### Supplementary Figure 5

The MI of the effect of indomethacin (Indo) on the BIMU8-induced gastric and duodenal contractions (A) MI of the phase II- and III-like gastric contractions induced by BIMU8 treatment under Indo infusion was observed. Neither phase II-like nor phase III-like MI of the gastric contractions was suppressed by Indo treatment. (B) Similar to the stomach contractions, Indo treatment did not show any effect on the MI of the BIMU8-induced phase II- and III-like duodenal contractions. The methodology followed to calculate the MI is described in the Materials and Methods section. Mean  $\pm$  SEM. Student's t-test (unpaired); NS,  $P > 0.05$ ;  $N = 3$ .
